# Supplementary material for: Differential Expression of IL-36 Family Members and IL-38 by Immune and Nonimmune Cells in Patients with Active Inflammatory Bowel Disease
Source: Hindawi journal article supplement (doi:10.1155/2018/5140691), 2018-12-10
Supplement: f1 [file 5140691.f1.docx]

**Figure 6. Figure 2. IL-36 family relative gene expression quantified by RT-PCR.** a) IL-36α gene expression. b) IL-36ß gene expression, c) IL-36γ gene expression. RT-qPCR was performed to assess mRNA levels in colonic mucosa biopsies from IBD patients, bars show means with standard error of the mean of IL-36α, IL-36ß and IL-36γ transcript levels with GAPDH as housekeeping gene determined by 2 ∆ ∆Ct, differences among groups were assessed by Kruskall Wallis test, and p values are presented in the figure.

**
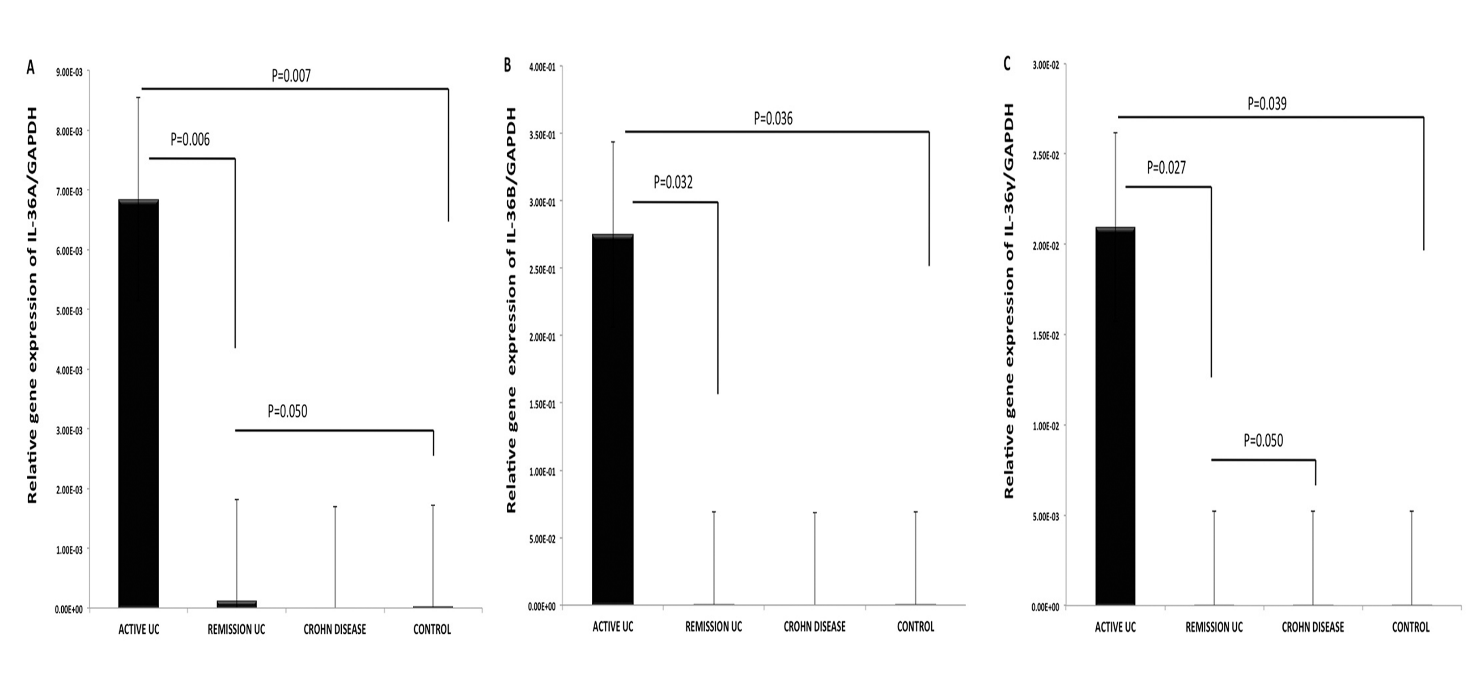
**
